# Supplementary material for: Potential mobile units drive the horizontal transfer of phytoplasma effector phyllogen genes
Source: Front Genet. 2023 May 11;14:1132432. doi: 10.3389/fgene.2023.1132432 (PMC10210161; doi:10.3389/fgene.2023.1132432)
Supplement: Supplementary file 2 [file Table1.xlsx]

## Sheet: Table S1
Table S1. Phytoplasma strains with phyllogen sequence and its flanking sequence.
Species	Strain name	Abbreviation	GenBank accession no. of phyllogen	GenBank accession no. of phyllogen flanking sequence	phylllogen position in the sequences		Reference of phyllogen	phyllogen group
					start (bp)	finish (bp)
Ca. P. asteris	aster yellows witches' broom	AY-WB	CP000061c	CP000061	236169	236543	MacLean et al., 2011	phyl-A
	periwinkle leaf yellowing	DY2014	SRMC01000001	SRMC01000001	60956	61333	Cho et al., 2019	phyl-A
	hydrangea phyllody	HP	LC388992	BSDA01000004	10312	10680	Iwabuchi et al., 2020	phyl-D
	mulberry dwarf	MD-China	CP085837	CP085837	180283	180651	Luo et al., 2022	phyl-D
	onion yellows	OY	AB812838	AB812838	61011	61388	Maejima et al., 2014	phyl-A
	paulownia witches' broom	PaWB-Chinaa	CP066882	CP066882	227023	227391	Cao et al., 2021	phyl-D
	paulownia witches' broom	PaWB-Japanb	BSCX01000004	BSCX01000004	45243	45611	This study	phyl-D
	rhus yellows	RhY	BSCY01000004	BSCY01000004	10558	10926	Iwabuchi et al., 2020	phyl-D
	rapeseed phyllody	RP166	CP055264	CP055264	67460	67837	Cho et al., 2020	phyl-D
	wheat blue dwarf	WBD	AVAO01000004Ψ	AVAO01000004	311	622	Chen et al., 2014	phyl-A
	aster yellows from apricot	A-AY	AB862477	LC740440	369	746	Maejima et al., 2014	phyl-A
	atypic aster yellows	AVUT	AB862478	LC740441	396	773	Maejima et al., 2014	phyl-A
	apricot chlorotic leafroll	AY-A	AB862479	LC740442	398	775	Maejima et al., 2014	phyl-A
	aster yellows	AY2192	AB862480	LC740443	397	774	Maejima et al., 2014	phyl-A
	carrot yellows	CA-76	AB862481	LC740444	398	775	Maejima et al., 2014	phyl-A
	gladiolus witches' broom	GLAW	AB897828	LC740447	397	774	Maejima et al., 2014	phyl-A
	leontodon yellows	LEO	AB862484	LC740448	397	774	Maejima et al., 2014	phyl-A
	primula green	PrG	AB862485	LC740449	396	773	Maejima et al., 2014	phyl-A
	peach yellows	PYR	AB862486Ψ	LC740450	397	675	Maejima et al., 2014	phyl-A
	oilseed rape virescence	RV	AB862487	LC740451	397	774	Maejima et al., 2014	phyl-A
	severe western aster yellows	SAY	AB862488	LC740452	397	774	Maejima et al., 2014	phyl-A
Ca. P. aurantifolia	'Echinacea purpurea' witches'-broom	EPWB	CP040925	CP040925	267768	268136	Chang, et al., 2015	phyl-D
	peanut witches' broom	PnWB	AMWZ01000001	AMWZ01000001	18413	18781	Cheng et al., 2013	phyl-D
			AMWZ01000003Ψ	AMWZ01000003	919	1224
Ca. P. luffae	NCHU2019	NCHU2019	CP054393d	CP054393d	351414	351779	Huang et al., 2022	phyl-D
					430808	431173
					739002	739367
Ca. P. phoenicium	picris echioides yellows	PEY	AB862490	LC740453	8269	8646	Maejima et al., 2014	phyl-A
Ca. P. pruni	Vc33	Vc33	LLKK01000018	LLKK01000018	6577	6921	Zamorano et al., 2016	phyl-C
	clover proliferation	CP	AB862489	LC740445	228	605	Maejima et al., 2014	phyl-A
Ca. P. trifolii	catharanthus phyllody	CPS	AB897827	LC740446	396	773	Maejima et al., 2014	phyl-A
Ca. P. ziziphi	jujube witches' broom	JWB	LC388971	-	-	-	Iwabuchi et al., 2020	phyl-D
	jujube witches' broom	JWB-nky	CP025121d	CP025121d	148824	149192	Wang et al., 2018a	phyl-D
					641867	642235
	Hebei-2018	Hebei-2018	CP091835d	CP091835d	210665	211033	unpubrished	phyl-D
					472896	473264
a PaWB phytoplasma detected in China (Cao et al., 2021).
b PaWB phytoplasma detected in Japan (Kakizawa et al., 2006).
c Known as SAP54 (MacLean et al., 2011).
d the genomes which retain multiple phyllogens
Ψ indicates N-terminus phyllogens truncated due to the premature stop codon.
References
Chang SH, Cho ST, Chen CL, Yang JY, Kuo CH (2015) Draft genome sequence of a 16SrII-A subgroup phytoplasma associated with purple coneflower (Echinacea purpurea) witches’ broom disease in Taiwan. Genome Announcements 3:e01398-15.
Zamorano A and Fiore N (2016) Draft Genome Sequence of 16SrIII-J Phytoplasma, a Plant Pathogenic Bacterium with a Broad Spectrum of Hosts. Genome Announcements 4:e00602-16.
Chen W, Li Y, Wang Q, Wang N, Wu Y (2014) Comparative genome analysis of wheat blue dwarf phytoplasma, an obligate pathogen that causes wheat blue dwarf disease in China. PLoS One 9: e96436.
Cao Y, Sun G, Zhai X, Xu P, Ma L, Deng M, Zhao Z, Yang H, Dong Y, Shang Z, Lv Y, Yan L, Liu H, Cao X, Li B, Wang Z, Zhao X, Yu H, Wang F, Ma W, Huang J, Fan G (2021) Genomic insights into the fast growth of paulownias and the formation of Paulownia witches’ broom. Molecular Plant 14:1–15.
Cho ST, Zwolińska A, Huang W, Wouters RHM, Mugford ST, Hogenhout SA, Kuo CH (2020) Complete Genome Sequence of “Candidatus Phytoplasma asteris” RP166, a Plant Pathogen Associated with Rapeseed Phyllody Disease in Poland. Microbiology Resource Announcements 9:e00760-20.
Mitrović J, Siewert C, Duduk B, Hecht J, Mölling K, Broecker F Beyerlein P, Büttner C, Bertaccini A, Kube M (2014) Generation and analysis of draft sequences of “stolbur” phytoplasma from multiple displacement amplification templates. Journal of Molecular Microbiology and Biotechnology 24:1–11.

## Sheet: Table S2
Table S2. Primers used in this study.
Primer name	Sequence (5'→3')	Purpose	Reference
fliA-uni_F	AAAGAGAGGATTTATACCAAGAAGG	determination for upstream sequences of the phyllogen-containing contigs of HP, RhY, PaWB-Japan, and PEY strains	this study
RhY12_R	CTATTGAAAATAACCACATATTTTTTTACC	determination for upstream sequences of the phyllogen-containing contigs of HP and RhY strains	this study
RhY-PaWB17_2F	TGTGGTATTCACGAACATGCC	determination for upstream sequences of the phyllogen-containing contigs of HP, RhY and PaWB-Japan strains	this study
RhY12-2R	GGTCTGCTGTAATCCACC	determination for upstream sequences of the phyllogen-containing contigs of HP and RhY strains	this study
RhY12-3R	CAACAAAGCACGTTCTGCTTC	determination for upstream sequences of the phyllogen-containing contigs of HP and RhY strains	this study
RhY12-PaWB8_R	CGGTGTAATCCAATTTGGGG	determination for upstream sequences of the phyllogen-containing contigs of HP, RhY and PaWB-Japan strains	this study
PaWB8-2R	CCTTTGGGATTCGATAGCATC	determination for upstream sequences of the phyllogen-containing contigs of PaWB-Japan strain	this study
PaWB8-3R	CGAGTAATAATCCCAATTGCTTG	determination for upstream sequences of the phyllogen-containing contigs of PaWB-Japan strain	this study
PEY-PHYL_R	TTAATCATCATTTAAAGTTTTTAAAAG	determination for upstream sequences of the phyllogen-containing contigs of PEY strain	this study
PEY_up2F	CAAACAACGAACAAATTCCTAAAATCG	determination for upstream sequences of the phyllogen-containing contigs of PEY strain	this study
PEY_up3F	CTATTTATTTTTCATCATTAGTAATATTATGGCC	determination for upstream sequences of the phyllogen-containing contigs of PEY strain	this study
PEY_up4F	TTATGAAACAACCCCAATTCTTCG	determination for upstream sequences of the phyllogen-containing contigs of PEY strain	this study
PEY_up5F	CTAAGAAAGGAGGTTATCTATGGC	determination for upstream sequences of the phyllogen-containing contigs of PEY strain	this study
PEY_up6F	TAACTTCGATCAAGTCCGCC	determination for upstream sequences of the phyllogen-containing contigs of PEY strain	this study
PEY_up7F	ACTATACCTTTGATGGTTTAAACGG	determination for upstream sequences of the phyllogen-containing contigs of PEY strain	this study
PEY_up2R	GTTATCTTTGTTAGCGAGTTGTTG	determination for upstream sequences of the phyllogen-containing contigs of PEY strain	this study
PEY_up3R	CTTTTAATTTTACTTTAGTTTCTTCATGAGC	determination for upstream sequences of the phyllogen-containing contigs of PEY strain	this study
PEY_up4R	CGCTTTGATGATTTCTTCAGGAG	determination for upstream sequences of the phyllogen-containing contigs of PEY strain	this study
PEY_up5R	CAGGAAAGAATTTGAAAAGGGTCC	determination for upstream sequences of the phyllogen-containing contigs of PEY strain	this study
PaWB10_F	TTCTTGGTATATTTGAGCTGTTTCC	determination for upstream sequences of the phyllogen-containing PMUs of PaWB-Japan strain	this study
PaWB10_2F	GTAATATCAGTAAAGAGTTTTTGGAGG	determination for upstream sequences of the phyllogen-containing PMUs of PaWB-Japan strain	this study
PaWB17_R	GTCGCTCAATTACTTTCTAAATCACAAT	determination for upstream sequences of the phyllogen-containing PMUs of PaWB-Japan strain	this study
PaWB17_2R	CCCTTAAACATCTATTTAATATCTTCC	determination for upstream sequences of the phyllogen-containing PMUs of PaWB-Japan strain	this study
RhY11_F	CGTTGTTATCATTGTTTTCGGTG	determination for upstream sequences of the phyllogen-containing PMUs of RhY strain	this study
RhY11_2F	GCTATTTAATGATTCTAGTGATTCTCG	determination for upstream sequences of the phyllogen-containing PMUs of RhY strain	this study
RhY-fliA_R	TTGGTTTAACCAAATTTGATGAGGG	determination for upstream sequences of the phyllogen-containing PMUs of RhY strain	this study
RhY12_R	GGCATATTTATCAGATTTGCTATTTACC	determination for downstream sequences of the phyllogen-containing PMUs of RhY strain	this study
RhY18_F	TCTTGGATTAAGAGATTGATCAGG	determination for downstream sequences of the phyllogen-containing PMUs of RhY strain	this study
PEY_down1F	GATCCTAAAAAAAATACTCTTTTAGCC	determination for downstream sequences of the phyllogen-containing contigs of PEY strain	this study
PEY_down2F	CGCTTCCGAAATCGCTTCC	determination for downstream sequences of the phyllogen-containing contigs of PEY strain	this study
PEY_down3F	CCCTCATCAACTGTATCAAGG	determination for downstream sequences of the phyllogen-containing contigs of PEY strain	this study
PEY_down4F	CAATTCAATATCAACACTCAATGCG	determination for downstream sequences of the phyllogen-containing contigs of PEY strain	this study
PEY_down5F	ACAAACATCTCATCCGTGGG	determination for downstream sequences of the phyllogen-containing contigs of PEY strain	this study
PEY_down6F	CAACTTGGTTACACCCCCTT	determination for downstream sequences of the phyllogen-containing contigs of PEY strain	this study
PEY_down7F	AAATTATCGTTATCGACCATCTCC	determination for downstream sequences of the phyllogen-containing contigs of PEY strain	this study
PEY_down1R	TAATTATTTCAACTTTATCTTCTCC	determination for downstream sequences of the phyllogen-containing contigs of PEY strain	this study
PEY_down2R	GATAAAACCATATTCTAATAATTGATCG	determination for downstream sequences of the phyllogen-containing contigs of PEY strain	this study
PEY_down3R	CCTTTTTTGAATCCTTTCGTGGC	determination for downstream sequences of the phyllogen-containing contigs of PEY strain	this study
Fzn	AGACCGTCATCCTTTCGA	determination for the sequences between hflB-like genes and downstream of phyllogen	Jomantiene et al., 2007
Rb2	TTGAACCACTATTCCTTG	determination for the sequences between hflB-like genes and downstream of phyllogen	Jomantiene et al., 2007
2A-PHYL-RP166opt2F	TCCAACCCTGGGCCCATGAACAAGGATATCGCCAGC	cloning of PHYLRP166 to TRV expression vector	this study
PHYL-RP166opt2R	GTCCTTAAATCCTCAGTTGTTCTCGTCGTTGAGAG	cloning of PHYLRP166 to TRV expression vector	this study
2A-LFWB-F	TCCAACCCTGGGCCCATGGACCCTAACCTTCC	cloning of PHYLNCHU2019 to TRV expression vector	this study
pTRV2-LFWB-R	GTCCTTAAATCCCTAGTTGTCCTCGTCGTTG	cloning of PHYLNCHU2019 to TRV expression vector	this study
pTRV2-1173-1193F	TAGGGATTTAAGGACGTGAAC	cloning of PHYLRP166 and PHYLNCHU2019 to TRV expression vector	Iwabuchi et al., 2019
2A-R	GGGCCCAGGGTTGGACTCGA	cloning of PHYLRP166 and PHYLNCHU2019 to TRV expression vector	Iwabuchi et al., 2019
PHYL-HP_F	CGCTACCAAGATCACTAATATCGATAAGGAACTCCA	site-directed mutagenesis of PHYLJWB for cloning of PHYLHP to TRV expression vector	this study
PHYL-HP_R	TGGAGTTCCTTATCGATATTAGTGATCTTGGTAGCG	site-directed mutagenesis of PHYLJWB for cloning of PHYLHP to TRV expression vector	this study
PHYL-OYE33_F	CTCAAGTACAAGATCAGAGAAAACGCTGTTAAGAAG	site-directed mutagenesis of PHYLOY for cloning of PHYLOYE33 to TRV expression vector	this study
PHYL-OYE33_R	CTTCTTAACAGCGTTTTCTCTGATCTTGTACTTGAG	site-directed mutagenesis of PHYLOY for cloning of PHYLOYE33 to TRV expression vector	this study
PHYL-PEY_F	GCCAGCGCCAGCAACAACAACCCTAACATC	cloning of PHYLPEY to TRV expression vector	this study
PHYL-PEY_R	CGTCTGGTAGGTCTTGAGCTGTTCCTTCTG	cloning of PHYLPEY to TRV expression vector	this study
PHYL-PEY-inverse_F	CAGAAGGAACAGCTCAAGACCTACCAGACG	cloning of PHYLPEY to TRV expression vector	this study
PHYL-PEY-inverse_R	GATGTTAGGGTTGTTGTTGCTGGCGCTGGC	cloning of PHYLPEY to TRV expression vector	this study
trv-F	GCTGCTAGTTCATCTGCAC	insert check of the construct	Iwabuchi et al., 2019
trv-R	GCACGGATCTACTTAAAGAAC	insert check of the construct	Iwabuchi et al., 2019

## Sheet: Table S3
Table S3. Strains related to ‘Ca. P. asteris’ and ‘Ca. P. meliae’ used phylogenetic analysis.
Species	Strain name	Abbreviation	genome accession number	Reference
Ca. P. asteris	aster yellows witches' broom	AY-WB	CP000061	Bai et al., 2006
	chrysanthemum yellows	CYP	JSWH00000000	Pacifico et al., 2015
	De Villa	De Villa	CP035949	Coetzee et al., 2019
	periwinkle leaf yellowing	DY2014	SRMC00000000	Cho et al., 2019
	hydrangea phyllody	HP	BSDA00000000	This study
	rice orange leaf	LD1	MIEP00000000	Zhu et al., 2017
	maize bushy stunt	M3	CP015149	Orlovskis et al., 2017
	mulberry dwarf	MD-China	CP085837	Luo et al., 2022
	onion yellows	OY	AP006628	Oshima et al., 2004
	Paulownia witches' broom	PaWB-China	CP066882	Cao et al., 2021
	Paulownia witches' broom	PaWB-Japan	BSCX00000000	This study
	rhus yellows	RhY	BSCY00000000	This study
	rapeseed phyllody	RP166	CP055264	Cho et al., 2020
	'Santalum album' aster yellows	SW86	JAGVSK000000000	unpublished
	'Elaeagnus angustifolia' witches'-broom	TBZ1	JAHFWK000000000	unpublished
	wheat blue dwarf	WBD	AVAO00000000	Chen et al., 2014
Ca. P. meliae	ChTYXIII-Mo	ChTYXIII-Mo	JACAOD000000000	Fernández et al., 2021
References
Orlovskis Z, Canale MC, Haryono M, Lopes JRS, Kuo CH, Hogenhout SA (2017) A few sequence polymorphisms among isolates of Maize bushy stunt phytoplasma associate with organ proliferation symptoms in infected maize plants. Annals of Botany 119:869–884.
Zhu Y, He Y, Zheng Z, Chen J, Wang Z, Zhou G (2017) Draft genome sequence of rice orange leaf phytoplasma from Guangdong, China. Genome Announcements 5: e00430–17.
Coetzee B, Douglas-Smit N, Maree HJ, Burger JT, Krüger K, Pietersen G (2019) Draft genome sequence of a “Candidatus Phytoplasma asteris”-related strain (aster yellows, subgroup 16SrI-B) from South Africa. Microbiology Resource Announcements 8:e00148-19.
Fernández FD, Conci LR (2021) Genome characterization of ‘Candidatus Phytoplasma meliae’ (isolate ChTYXIII). bioRxiv doi.org/10.1101/2021.05.31.446484
Pacifico D, Galetto L, Rashidi M, Abbà S, Palmano S, Firrao G, Bosco D, Marzachì C (2015) Decreasing global transcript levels over time suggest that phytoplasma cells enter stationary phase during plant and insect colonization. Appl Environ Microbiol 81:2591–2602.

## Sheet: Table S4
Table S4. Codon-optimized and synthesized phyllogen sequences used in this study.
Phyllogen name	Sequence (5'→3')
PHYLRP166	ATGAACAAGGATATCGCCAGCGCCAGCAACAACAACCAGAACATCACCAACTACAGCATCGAAGAGAACATTATCAACCTCAAGTACAAGATCCGTGAGAACGCCGTGAAGAAGATCAACACCGAGTCTGAGATCCAGCAGCTCTCTAACAACGACCCGAAGAAGAACACTCTCCTCGCTCTTAAGCAGAACCTCGAGAACCTCATCAACAATCAGAAGAAGCAGCTCAAGACCTACCAGACGCTTCTCAAGACTCTCAACGACGAGAACAACTGA
PHYLNCHU2019	ATGGACCCTAACCTTCCTGGGACTTCTTCTAACCAGCCTGCTCACCAGAACTTCACCATCGAAGAGAACATCATCAACCTCAAGCAAAAGATCTACTACAACGCCACCAAGATCACCAACATCGACAAGGCTCTCCAGGGATCTATCACCGATGATGACAAGACCAACCTCCTCAAGCTCAAAGAGAACCACAAGAGGCTCATCGACAACCAGAAAGAGCAGCTCAAGACCTACAAGAACCTGCTCAAGAACCTCAACGACGAGGACAACTGA

## Sheet: Table S5
Table S5. General features of the draft genomes sequenced in this study and the complete genomes of ‘Ca. P. asteris’-related strains. One phyllogen homolog belonging to phyl-D group was found in each of HP contig 4, RhY contig12 and PaWB contig8.
Strain	HP	RhY	PaWB-Japan	OY-Ma	AY-WBb	MBSPc	De Villad	PaWB-Chinae
Number of contigs	34	43	103	1	1	1	1	1
Total length (bp)	641311	609849	776015	853092	723870	576118	603949	891641
Average length of contigs (bp)	18862	14183	7534	–	–	–	–	–
Maximum length of contigs (bp)	181023	73048	113840	–	–	–	–	–
N50 contig length (bp)	140653	41738	45936	–	–	–	–	–
GC content (%)	28	28	28	28	27	28	28	27
Average Depthf	59.4	60	72	–	–	–	–	–
Number of CDSs	567	538	793	942	693	485	602	1011
Number of rRNA operons	1	1	1	2	2	2	2	2
Number of tRNAs	30	30	31	32	31	32	32	32
Genome Completeness (%) g	99	99	99	99	99	99	99	99
Genome Contamination (%) h	0	0	0.6	0.2	0	0	0	0.9
a NCBI Genbank accession numbers AP006628.2 (chromosome), AB479514.1 (pOYM), and AB097150.1 (EcOYM). The CDSs were re-annotated using MetaGeneAnnotator (Noguchi et al. 2008).
b The numbers are those of Bai et al. (2006). Data on four plasmids are included.
c The numbers are those of Orlovskis et al. (2017).
d The numbers are those of Coetzee et al. (2019). Data on one plasmid are included.
e NCBI Genbank accession numbers CP066882.1 (chromosome). Sequences of two plasmids were not included. The CDSs were re-annotated using MetaGeneAnnotator (Noguchi et al. 2008) .
f Number of mapped reads per base of the sequenced genome.
g estimated completeness of genome as determined from the presence/absence of marker genes and the expected collocalization of these genes observed by CheckM (Parks et al., 2015).
h estimated contamination of genome as determined by the presence of multi-copy marker genes and the expected collocalization of these genes observed by CheckM (Parks et al., 2015).

## Sheet: Table S6
Table S6. Pairwise amino acid sequence identities of phyllogen (Phyl-A group) flanking ORFs.
gene name	fliA					hp1
strain name		PEY	RP 166	AYWB	DY 2014	strain name	PEY	RP166	AYWB	DY2014
	PEY					PEY
	RP166	58.3333				RP166	82.1678
	AYWB	70.073	70.1493			AYWB	69.1489	69.5035
	DY2014	88.4058	66.092	72.2543		DY2014	82.9181	83.274	70.8633
	OY	89.1304	70.1493	74	98.8506	OY	82.9181	83.274	70.8633	100
gene name	ssb					hp2
strain name		PEY	RP166	AYWB	DY2014		PEY	RP166	AYWB	DY2014
	PEY					PEY
	RP166	78.8462				RP166	80.1932
	AYWB	82.5688	75			AYWB	79.056	70.0483
	DY2014	93.578	75	77.0642		DY2014	87.6676	73.8318	74.269
	OY	93.578	75	77.0642	100	OY	87.3995	73.8318	73.9766	99.7442
gene name	dam					hflB-like
strain name		PEY	DY2014				PEY	RP166	AYWB	DY2014
	PEY					PEY
	DY2014	90.8				RP166	66.3866
	OY	90.8	100			AYWB	69.7368	57.047
						DY2014	80	65.2542	64.4737
						OY	79.5833	64.8305	64.4737	98.7552
gene name	himA					phyllogen
strain name		PEY	RP166	AYWB	DY2014		PEY	RP166	AYWB	DY2014
	PEY					PEY
	RP166	75				RP166	96
	AYWB	83.3333	76.0417			AYWB	87.9032	87.0968
	DY2014	89.5833	79.1667	83.3333		DY2014	90.4	91.2	88.7097
	OY	89.5833	79.1667	83.3333	100	OY	90.4	91.2	88.7097	100
gene name	hflB
strain name		PEY	RP166	AYWB	DY2014
	PEY
	RP166	86.6841
	AYWB	76.0471	72.644
	DY2014	87.1486	86.6131	75.1678
	OY	86.1264	85.5769	75.0689	99.328

## Sheet: Table S7
Table S7. Pairwise amino acid sequence identities of phyllogen (Phyl-D group) flanking ORFs.
gene name	fliA								smc-like
strain name		HP	RhY	PaWB-Japan	PaWB-China	JWB-nky	NCHU2019			HP	RhY	PaWB-Japan	PaWB-China	JWB-nky	Vc33
	HP								HP
	RhY	100							RhY	99.6283
	PaWB-Japan	87.7419	87.7419						PaWB-Japan	31.4655	31.4655
	PaWB-China	97.4194	97.4194	85.1613					PaWB-China	49.8113	49.8113	35.0877
	JWB-nky	53.1034	53.1034	53.4722	57.2864				JWB-nky	50.9434	50.9434	34.6491	94.9458
	NCHU2019	48.3444	48.3444	47.0199	54.1463	72.3618			Vc33	33.0645	33.0645	32.3232	37.7049	37.7049
	Hebei-2018	54.1667	54.1667	50	63.4921	66.6667	67.4603		Hebei-2018	51.8657	50.5618	36	94.9458	100	37.7049
gene name	dam								hp8
strain name		PaWB-Japan	PaWB-China							HP	RhY	PaWB-Japan	PaWB-China	JWB-nky
	PaWB-Japan								HP
	PaWB-China	79.7753							RhY	100
	JWB-nky	46.0843	46.4684						PaWB-Japan	93.7888	93.7888
									PaWB-China	97.7099	97.7099	99.2366
									JWB-nky	85.7143	85.7143	87.3016	91.6667
									Hebei-2018	85.6	85.6	87.2	91.5789	100
gene name	ssb								phyllogen
strain name		JWB-nky	NCHU2019							HP	RhY	PaWB-Japan	PaWB-China	JWB-nky	NCHU2019	Vc33
	JWB-nky								HP
	NCHU2019	70.0935							RhY	100
	Hebei-2018	84.5	73.8						PaWB-Japan	100	100
									PaWB-China	100	100	100
									JWB-nky	100	100	100	100
									NCHU2019	82.6446	82.6446	82.6446	82.6446	82.6446
									Vc33	47.2727	47.2727	47.2727	47.2727	47.2727	46.789
									Hebei-2018	100	100	100	100	100	82.6446	47.3
gene name	himA								hp9
strain name		HP	RhY	PaWB-Japan	PaWB-China	JWB-nky	NCHU2019			HP	RhY	PaWB-Japan	PaWB-China	JWB-nky	NCHU2019
	HP								HP
	RhY	100							RhY	98.9501
	PaWB-Japan	96.875	96.875						PaWB-Japan	84.3137	83.7535
	PaWB-China	95.8333	95.8333	98.9583					PaWB-China	83.4646	84.5144	71.7445
	JWB-nky	73.9583	73.9583	73.9583	72.9167				JWB-nky	92.9134	93.9633	77.0936	87.2093
	NCHU2019	72.9167	72.9167	75	73.9583	77.0833			NCHU2019	56.8027	56.1224	57.8035	55.3936	55.6851
	Vc33	69.7917	69.7917	68.75	67.7083	76.0417	68.75		Hebei-2018	77.7778	78.125	61.0224	70.9199	84.8665	38.9381
gene name	hp6								tmk
strain name		HP	RhY	PaWB-Japan	PaWB-China	JWB-nky	NCHU2019	Vc33		PaWB-Japan	PaWB-China	JWB-nky	NCHU2019
	HP								PaWB-Japan
	RhY	100							PaWB-China	90.2098
	PaWB-Japan	40.5941	40.5941						JWB-nky	47.2637	43.0657
	PaWB-China	97.1698	97.1698	39.604					NCHU2019	49.2537	42.5373	66.0194
	JWB-nky	46.6667	46.6667	45.0549	45.5556				Hebei-2018	47.3	43.1	100	66.0194
	NCHU2019	58.3333	58.3333	43.617	56.25	50.5495
	Vc33	50	50	43.6782	50	48.3146	46.1538
	Hebei-2018	51.5152	51.5152	45.0549	50	100	58.209	50.7
gene name	hp7								dnaB
strain name		HP	RhY	PaWB-Japan	PaWB-China	JWB-nky	NCHU2019	Vc33		HP	RhY	PaWB-Japan	PaWB-China	JWB-nky	NCHU2019
	HP								HP
	RhY	99.5122							RhY	99.6124
	PaWB-Japan	45.8128	45.8128						PaWB-Japan	93.7984	93.4109
	PaWB-China	99.5122	99.5122	45.8128					PaWB-China	95.3488	94.9612	96.5278
	JWB-nky	50.2488	50.2488	59.2965	50.7463				JWB-nky	26.2948	25.8964	26.4151	25.522
	NCHU2019	49.7512	49.2537	55	49.5	58.5859			NCHU2019	26.9076	26.506	26.969	26.3529	70.0611
	Vc33	55.5	55.5	54.5	55.5	60.6061	73		Hebei-2018	22.5	22.5	27.2	26	94.8	64
	Hebei-2018	48	48	56.8047	48	99.4186	55.4	57.1
gene name	hflB								dnaG
strain name		HP	RhY	PaWB-Japan	PaWB-China	JWB-nky	NCHU2019	Vc33		JWB-nky	NCHU2019
	HP								JWB-nky
	RhY	99.7487							NCHU2019	73.6961
	PaWB-Japan	74.8744	74.8744						Hebei-2018	79.8	64.9
	PaWB-China	84.1709	84.4221	66.8342
	JWB-nky	67.2589	67.2589	64.9874	67.9389
	NCHU2019	65.051	64.8718	65.2284	64.8718	76.5306
	Vc33	65.7431	65.7431	65.5779	65.995	77.4936	74.0554
	Hebei-2018	66.8	66.8	64.5	67.4	99.4962	76.2755	77
gene name	smc								tra5
strain name		HP	RhY	PaWB-Japan	PaWB-China	JWB-nky	NCHU2019	Vc33		PaWB-Japan	PaWB-China	JWB-nky	NCHU2019
	HP								PaWB-Japan
	RhY	100							PaWB-China	98.0769
	PaWB-Japan	65.8	65.8						JWB-nky	74.2765	73.0769
	PaWB-China	65.8	65.8	100					NCHU2019	75.3994	76.0383	76.2821
	JWB-nky	65.8	65.8	88.5185	88.5185				Hebei-2018	70.5	70.1	91.8	73.4
	NCHU2019	58.6331	58.6331	59.8566	59.8566	63.7993
	Vc33	40.3194	40.3194	41.0681	41.0681	44.052	55.1971
	Hebei-2018	66.6	66.6	90.9259	90.9259	97.7778	63.8	44.1

## Sheet: Table S8 
table S8. Correspondence between locus tags of draft genome determined in this study and gene name designated in Fig. 1.
'Ca. P. asteris' HP		'Ca. P. asteris' RhY		'Ca. P. asteris' PaWB-Japan
locus_tag	gene name	locus_tag	gene name	locus_tag	gene name
HP2P_4120	fliA	RHYP_1750	fliA	PAWBP_2820	fliA
HP2P_4130	-	RHYP_1760	-	PAWBP_2830	-
HP2P_4140	dnaB	RHYP_1770	dnaB	PAWBP_2840	dnaB
HP2P_4150	himA	RHYP_1780	himA	PAWBP_2850	-
HP2P_4160	-	RHYP_1790	-	PAWBP_2860	tmk
HP2P_4170	hp4	RHYP_1800	hp4	PAWBP_2870	damψ
HP2P_4180	hp5	RHYP_1810	hp5	PAWBP_2880	damψ
HP2P_4190	hp6	RHYP_1820	hp6	PAWBP_2890	himA
HP2P_4200	hp7	RHYP_1830	hp7	PAWBP_2900	-
HP2P_4210	hflB	RHYP_1840	hflB	PAWBP_2910	hp4
HP2P_4220	smcψ	RHYP_1850	smcψ	PAWBP_2920	hp5
HP2P_4230	smcψ	RHYP_1860	smcψ	PAWBP_2930	hp6
HP2P_4240	smc-like	RHYP_1870	smc-like	PAWBP_2940	hp7
HP2P_4250	-	RHYP_1880	-	PAWBP_2950	hflB
HP2P_4260	hp8	RHYP_1890	hp8	PAWBP_2960	smcψ
HP2P_4270	phyllogen	RHYP_1900	phyllogen	PAWBP_2970	smcψ
HP2P_4280	-	RHYP_1910	-	PAWBP_2980	smcψ
HP2P_4290	-	RHYP_1920	-	PAWBP_2990	smc-like
HP2P_4300	hp9	RHYP_1930	hp9	PAWBP_3000	hp8
HP2P_4310	-	RHYP_1940	-	PAWBP_3010	phyllogen
HP2P_4320	-	RHYP_1950	-	PAWBP_3020	hp9ψ
HP2P_4330	-	RHYP_1960	-	PAWBP_3030	hp9ψ
HP2P_4340	-	RHYP_1970	-	PAWBP_3040	-
				PAWBP_3050	-
				PAWBP_3060	-
				PAWBP_3070	-
				PAWBP_3080	tra5
